# Supplementary material for: Intratumoral T‐cell receptor repertoire is predictive of interim PET scan results in patients with diffuse large B‐cell lymphoma treated with rituximab/cyclophosphamide/doxorubicin/prednisolone/vincristine (R‐CHOP) chemoimmunotherapy
Source: PubMed Central journal article supplement (PMC8548874; doi:10.1002/cti2.1351), 2021-10-27
Supplement: CTI2-10-e1351-s001.pdf [file CTI2-10-e1351-s001.pdf]

## Supplementary table 1

**TCR sequencing results of pre-therapy peripheral blood T-cell populations sorted by FACS in selected patients (n=6).**

| T-cell populations                  | Yield (number of cells)     | TCR sequencing results |                            |                             |                        |                        |
|-------------------------------------|-----------------------------|------------------------|----------------------------|-----------------------------|------------------------|------------------------|
|                                     |                             | DNA input ng           | Total productive sequences | Unique productive sequences | Productive clonality   | MaxFreq                |
| CD4 <sup>+</sup> PD-1 <sup>HI</sup> | 14,525<br>(4,740-33,060)    | 64<br>(34-220)         | 3,108<br>(669-6,908)       | 2,604<br>(607-5,832)        | 0.01<br>(0.005-0.014)  | 0.005<br>(0.002-0.02)  |
| CD4 <sup>+</sup> PD-1 <sup>LO</sup> | 10,545<br>(3,860-37,150)    | 52<br>(6-288)          | 527<br>(121-10,925)        | 468<br>(103-8,342)          | 0.008<br>(0.007-0.14)  | 0.01<br>(0.001-0.033)  |
| Tregs                               | 28,465<br>(12,030-100,000)  | 151<br>(90-216)        | 7,499<br>(1,116-18,727)    | 5,353<br>(967-13,056)       | 0.022<br>(0.007-0.045) | 0.005<br>(0.003-0.015) |
| CD4-Tem                             | 27,485<br>(5,130-58,330)    | 80<br>(9-964)          | 2,044<br>(42-15,607)       | 935<br>(37-7,989)           | 0.055<br>(0.011-0.236) | 0.051<br>(0.005-0.219) |
| Other CD4 <sup>+</sup> T cells      | 145,500<br>(48,040-290,000) | 292<br>(122-426)       | 19,551<br>(8,298-45,252)   | 17,369<br>(7,208-38,270)    | 0.005<br>(0.003-0.008) | 0.001<br>(0.0-0.001)   |
| CD8 <sup>+</sup> PD-1 <sup>HI</sup> | 89,545<br>(29,220-153,000)  | 316<br>(129-595)       | 20,659<br>(1,926-37,129)   | 2,630<br>(743-6,009)        | 0.292<br>(0.202-0.604) | 0.134<br>(0.063-0.534) |
| CD8 <sup>+</sup> PD-1 <sup>LO</sup> | 56,945<br>(12,480-223,000)  | 100<br>(69-346)        | 11,085<br>(290-24,619)     | 1,564<br>(228-4,524)        | 0.340<br>(0.032-0.704) | 0.116<br>(0.033-0.711) |

MaxFreq, frequency of most abundant clonotype in the sample; Tregs, CD4<sup>+</sup> regulatory T cells (CD4<sup>+</sup>CD25<sup>HI</sup>CD127<sup>LO</sup>); CD4-Tem, CD4-effector memory cells (CD4<sup>+</sup>CCR7<sup>-ve</sup>CD45RA<sup>-ve</sup>).

All values are median (range).

## Supplementary table 2

**Yield of EBV-specific T cells by pentamer sorting in 2 patients with high EBER-1 expression (EBER-1 gene count >1000) in the diagnostic biopsy.**

| Patient | Age, Sex | EBV-latency profile | MHC-I pentamer | Epitope Target | T cell yield (n) |
|---------|----------|---------------------|----------------|----------------|------------------|
| 01      | 53, F    | Latency III         | A*24:02-TYG    | LMP-2          | 15,470           |
|         |          |                     | A*02:01-FLY    | LMP-2          | 19               |
| 02      | 57, F    | Latency I           | B*35:01-HPV    | EBNA-1         | 260              |

EBER, EBV-encoded RNA; LMP, EBV-latent membrane protein; EBNA, EBV-nuclear antigen.

## Supplementary table 3

### Antibodies used for FACS

| Antibody                                  | Clone      | Fluorochrome       | Manufacturer    | Isotype control |
|-------------------------------------------|------------|--------------------|-----------------|-----------------|
| CD14                                      | M5E2       | FITC               | BD Biosciences  | Mouse IgG2a, k  |
| CD16                                      | 3G8        | FITC               | Biolegend       | Mouse IgG1, k   |
| CD19                                      | HIB19      | FITC               | BD Biosciences  | Mouse IgG1, k   |
| CD56                                      | AF12-7H3   | Vio-Bright<br>FITC | Miltenyi Biotec | Mouse IgG1, k   |
| PD-1                                      | PD1.3.1.3  | PE                 | Miltenyi Biotec | Mouse IgG2b, k  |
| CD127                                     | hIL-7R-M21 | PerCP/Cy5.5        | BD Biosciences  | Mouse IgG1, k   |
| CD25                                      | BC96       | APC                | Biolegend       | Mouse IgG1, k   |
| CD45RA                                    | HIB100     | Alexa Fluor700     | BD Biosciences  | Mouse IgG2b, k  |
| CCR7                                      | 150503     | BV421              | BD Biosciences  | Mouse IgG2a, k  |
| CD8                                       | SK1        | BV785              | Biolegend       | Mouse IgG1, k   |
| CD3                                       | SK7        | BUV395             | BD Biosciences  | Mouse IgG1, k   |
| CD4                                       | SK3        | BUV737             | BD Biosciences  | Mouse IgG1, k   |
| Live/Dead Fixable Near-IR Dead Cell Stain | -          | -                  | Invitrogen      | -               |

**Supplementary figure 1**

**Tracking the EBV-specific CD8<sup>+</sup> T-cell clonotypes in diagnostic biopsy, pre-therapy blood and post cycle #4 blood samples.**

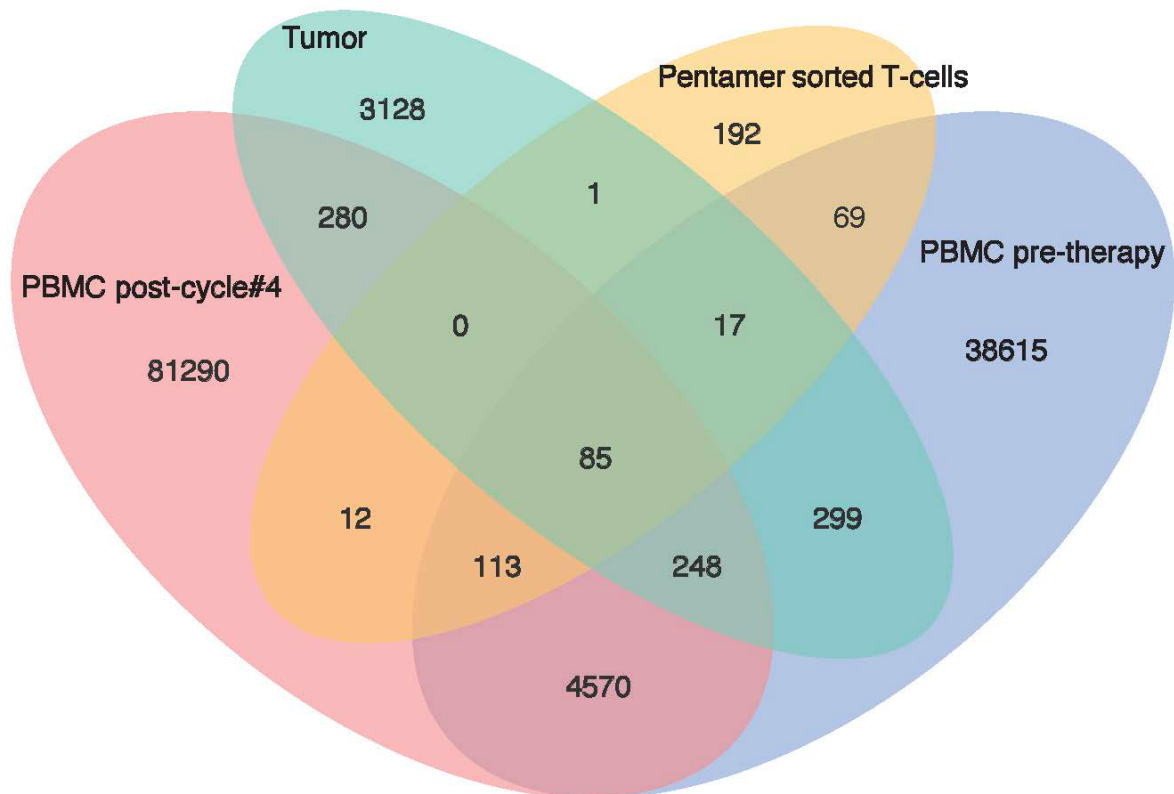

EBV-specific CD8<sup>+</sup> T-cell clonotypes (targeting LMP-2) were sorted by HLA- A\*24:02-TYG pentamers in a patient with EBV<sup>+</sup> DLBCL. These clonotypes were tracked in diagnostic biopsy and pre-therapy and post-cycle #4 blood samples by CDR3 nucleotide matching. The numbers shown are those of unique clonotypes.

## Supplementary figure 2

### FACS Gating strategy

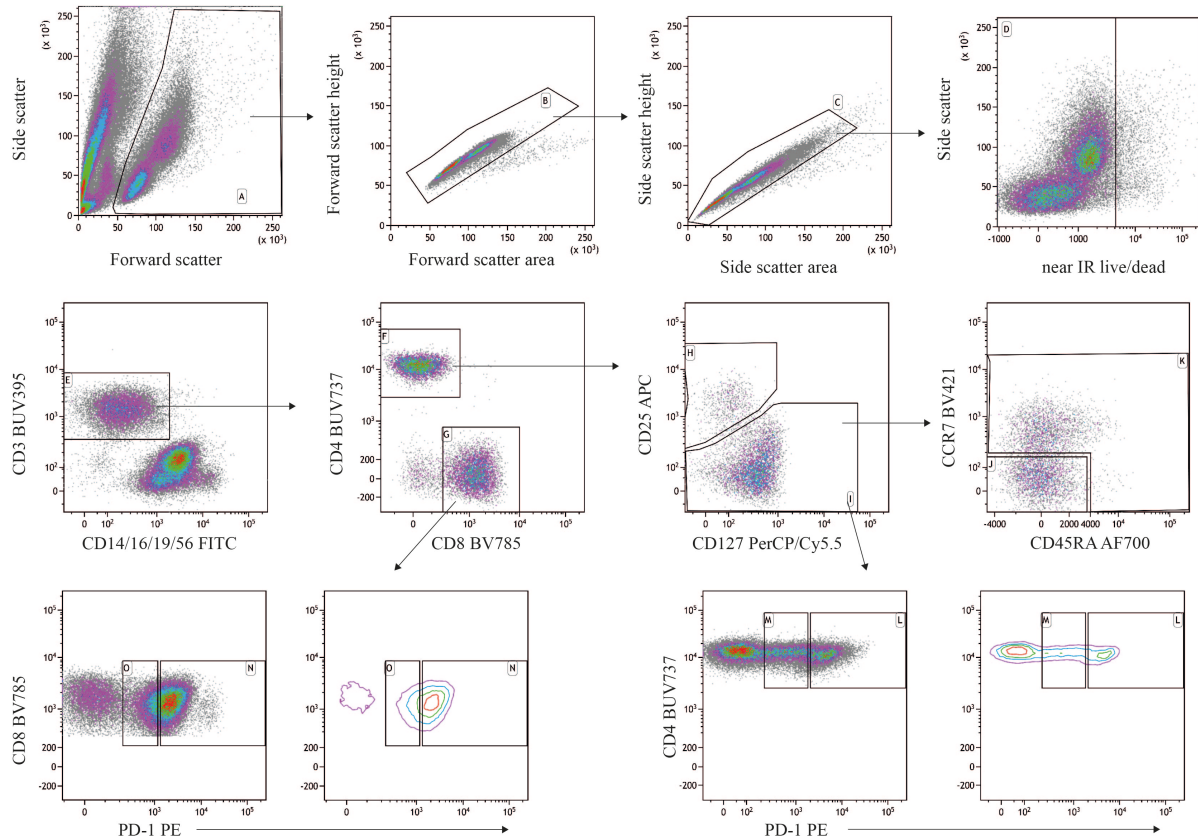

Flow cytometry gating strategy for T-cell subpopulations: Live singlet lymphocytes were gated. Viable cells were selected by LIVE/DEAD™ Fixable Near-IR Dead Cell Stain. T cells were identified by CD3<sup>+</sup> CD14<sup>-</sup> CD16<sup>-</sup> CD19<sup>-</sup> CD56<sup>-</sup>. CD3<sup>+</sup> T cells were then separated into CD4 and CD8. CD8<sup>+</sup> T cells were sorted into 2 populations based on their PD-1 expression: CD8<sup>+</sup> PD-1<sup>HI</sup>, and CD8<sup>+</sup> PD-1<sup>LO</sup>. CD4<sup>+</sup> T cells were first sorted into CD25<sup>HI</sup> CD127<sup>LO</sup> Treg and CD25<sup>LO</sup> CD127<sup>HI</sup> T cells. The CD25<sup>LO</sup> CD127<sup>HI</sup> subset was further sorted into CD4<sup>+</sup> effector memory T cells (CCR7<sup>LO</sup> CD45RA<sup>LO</sup>), combined CD4<sup>+</sup> central memory, naive and CD45RA expressing effector memory T cells, CD4<sup>+</sup> PD-1<sup>HI</sup> and CD4<sup>+</sup> PD-1<sup>LO</sup> T cells.
